# Supplementary material
Source: publisher figshare collection journal article supplement (https://gsajournals.figshare.com/ndownloader/files/22232556)
Supplement: Supplementary file 1 [file 22232556]

## Sheet: strains
Table S1
Strain	Genotype	Source	Reference
BC15839	dpy-5(e907); sIs14542 [rCesT01D3.2-GFP + pCeh361]	CGC	McKay et al. (2004)
CX3198	sax-3(ky123)	CGC	Zallen et al. (1998)
CZ1200	juIs76 [unc-25p::GFP + lin-15(+)]; lin-15(n765)	CGC	Zhen and Jin (1999)
EM67	mab-20(bx24); him-5(e1490)	CGC	Baird et al. (1991)
IC476	sax-3(ky123); quEx99 [sax-3(minigene) + odr-1p::RFP]	CGC	Ghenea et al. (2005)
KQ1865	ftEx1074 [hlh-34p::mCherry; rol-6(su1006)]	Kaveh Ashrafi, UCSF	Cunningham et al. (2012)
MT19703	nIs394 [ngn-1::GFP + lin-15(+)]; lin-15(n765)	CGC	Nakano et al. (2010)
OH904	otIs33 [kal-1p::GFP]	CGC	Bülow et al. (2002)
OH99	mgIs18 [ttx-3p::GFP]	CGC	Hobert et al. (1997)
RW10055	unc-119(ed3); stIs10055 [cnd-1p(3.2kb)::HIS-24::mCherry + unc-119(+)]	CGC	Murray et al. (2012)
ST65	ncIs13 [ajm-1::GFP]	CGC	Liu et al. (2005)
UL1829	unc-119(ed3); leEx1829 [unc-42p::GFP + unc-119(+)]	Ian Hope	Hope et al. (2004)
VL4	unc-119(ed3); wwEx37 [ngn-1p::GFP + unc-119(+)]	CGC	Grove et al. (2009)
ATL96	otIs33 [kal-1p::GFP]; ujIs113 [pie-1::mCherry::Histone H2B + nhr-2p::mCherry::HIS-24 + unc-119(+)]	this work
ATL126	cnd-1(ju29); ngn-1(ok2200); otIs33 [kal-1p::GFP]	this work
ATL127	ngn-1(ok2200) mgIs18 [ttx-3p::GFP]	this work
ATL135	vab-1(dx31); mgIs18 [ttx-3p::GFP]	this work
ATL140	efn-4(bx80) mgIs18 [ttx-3p::GFP]	Martin Hudson	Schwieterman et al. (2016)
ATL143	ngn-1(ok2200) 6x outcross	this work
ATL150	daf-18(bx480) mgIs18 [ttx-3p::GFP]	this work
ATL156	daf-18(ok480); ngn-1(ok2200) mgIs18 [ttx-3p::GFP]	this work
ATL163	efn-4(bx80) ngn-1(ok2200) mgIs18 [ttx-3p::GFP]	this work
ATL164	mab-20(bx24); mgIs18 [ttx-3p::GFP]	Martin Hudson	Schwieterman et al. (2016)
ATL166	vab-1(dx31)/mIn1 mIs14; ngn-1 (ok2200) mgIs18 [ttx-3p::GFP]	this work
ATL167	mab-20(bx24); ngn-1(ok2200) mgIs18 [ttx-3p::GFP]	this work
ATL184	ngn-1(ok2200); sax-3(ky123); quEx99 [sax-3(minigene) + odr-1p::RFP]	this work
ATL185	nIs394 [ngn-1::GFP + lin-15(+)]; ngn-1(ok2200)	this work
ATL188	sdn-1(zh20); ngn-1(ok2200) mgIs18 [ttx-3p::GFP]	this work
ATL189	juIs76 [unc-25p::GFP + lin-15(+)] 8x outcross	this work
ATL190	sdn-1(zh20); mgIs18 [ttx-3p::GFP]	Martin Hudson	Schwieterman et al. (2016)
ATL192	ngn-1(ok2200); leEx1829 [unc-42p::GFP + unc-119(+)]	this work
ATL208	ngn-1(ok2200); stIs10055 [cnd-1p(3.2kb)::HIS-24::mCherry + unc-119(+)]	this work
ATL209	ngn-1(ok2200); wwEx37 [ngn-1p::GFP + unc-119(+)]	this work
ATL210	stIs10055 [cnd-1p(3.2kb)::HIS-24::mCherry + unc-119(+)]; wwEx37 [ngn-1p::GFP + unc-119(+)]	this work
ATL211	wwEx37 [ngn-1p::GFP + unc-119(+)] 4x outcross	this work
ATL221	cnd-1(ju29); mgIs18 [ttx-3p::GFP]	this work
ATL222	cnd-1(ju29); ngn-1(ok2200) mgIs18 [ttx-3p::GFP]	this work
ATL254	ngn-1(ok2200); ncIs13 [ajm-1::GFP]	this work
ATL255	leEx1829 [unc-42p::GFP + unc-119(+)]; ftEx1074[hlh-34p::mCherry + rol-6(su1006)]	this work
Table S1. List of strains used in the course of this work.

## Sheet: strain references
Strain references
Baird SE, Fitch DHA, Kassem IAA, & Emmons SW (1991). Pattern formation in the nematode epidermis: determination of the arrangement of peripheral sense organs in the C. elegans male tail. Development, 113, 515-26.
Bülow H. E., Berry K. L., Topper L. H., Peles E., and Hobert O. (2002) Heparan sulfate proteoglycan-dependent induction of axon branching and axon misrouting by the Kallmann syndrome gene kal-1. Proc. Natl. Acad. Sci. USA 99, 6346–6351.
Cunningham, K. A., Hua, Z., Srinivasan, S., Liu, J., Lee, B. H., Edwards, R. H., & Ashrafi, K. (2012). AMP-activated kinase links serotonergic signaling to glutamate release for regulation of feeding behavior in C. elegans. Cell metabolism, 16(1), 113–121. https://doi.org/10.1016/j.cmet.2012.05.014
Ghenea S, Boudreau JR, Lague NP, & Chin-Sang ID (2005). The VAB-1 Eph receptor tyrosine kinase and SAX-3/Robo neuronal receptors function together during C. elegans embryonic morphogenesis. Development, 132, 3679-90.
Grove, C. A., De Masi, F., Barrasa, M. I., Newburger, D. E., Alkema, M. J., Bulyk, M. L. and Walhout, A. J. M. (2009). A Multiparameter Network Reveals Extensive Divergence between C. elegans bHLH Transcription Factors. Cell 138, 314–327.
Hobert O., Mori I., Yamashita Y., Honda H., Ohshima Y., et al. (1997). Regulation of interneuron function in the C. elegans thermoregulatory pathway by the ttx-3 LIM homeobox gene. Neuron 19, 345–357.
Hope, I. A., Stevens, J., Garner, A., Hayes, J., Cheo, D. L., Brasch, M. A., & Vidal, M. (2004). Feasibility of genome-scale construction of promoter::reporter gene fusions for expression in Caenorhabditis elegans using a multisite gateway recombination system. Genome Res. 14, 2070–2075.
Liu, Z., T. Fujii, A. Nukazuka, R. Kurokawa, M. Suzuki et al., 2005 C. elegans PlexinA PLX-1 mediates a cell contact-dependent stop signal in vulval precursor cells. Dev. Biol. 282: 138–151.
McKay et al, Cold Spring Harbor Symposia on Quantitative Biology 68: 159-169 2004
Murray, J. I., Boyle, T. J., Preston, E., Vafeados, D., Mericle, B., Weisdepp, P., … Waterston, R. H. (2012). Multidimensional regulation of gene expression in the C. elegans embryo. Genome research, 22, 1282–1294.
Nakano, S., Ellis, R. E. and Horvitz, H. R. (2010). Otx-dependent expression of proneural bHLH genes establishes a neuronal bilateral asymmetry in C. elegans. Development 137, 4017–4027.
Schwieterman, A. A., Steves, A. N., Yee, V., Donelson, C. J., Bentley, M. R., Santorella, E. M., Mehlenbacher, T. V., Pital, A., Howard, A. M., Wilson, M. R., et al. (2016). The Caenorhabditis elegans ephrin EFN-4 functions non-cell autonomously with heparan sulfate proteoglycans to promote axon outgrowth and branching. Genetics 202, 639–660.
Zallen JA, Yi BA, & Bargmann CI (1998). The conserved immunoglobulin superfamily member SAX-3/Robo directs multiple aspects of axon guidance in C. elegans. Cell, 92, 217-27
Zhen M, & Jin YS (1999). The liprin protein SYD-2 regulates the differentiation of presynaptic termini in C. elegans. Nature, 401, 371-5.
